# Supplementary material for: Diminished hepatic IFN response following HCV clearance triggers HBV reactivation in coinfection
Source: JCI journal article supplement (doi:10.1172/jci135616), 2020-03-12
Supplement: sd1 [file 1]

## 1 Supplemental Materials and Methods

### 3 Virus production and titration

4 The HBV stock was produced by collecting supernatant of HepG2.2.15 cells twice a week for  
5 three weeks and HCV stock was produced by collecting supernatant daily from Huh7.5.1 infected  
6 with high titer of HCV JFH-1 strain. Mock control of HBV or HCV virus stock are prepared by  
7 collecting culture supernatant from blank HepG2 and Huh7.5.1 cultures respectively. Collected  
8 supernatant were concentrated using centrifugal filter devices (Centricon Plus-70 and Biomax  
9 100.000; Millipore Corp., Bedford, MA). Immediately after collection, the virus or mock stocks  
10 were divided into aliquots and stored at  $-80^{\circ}\text{C}$  until use. HBV stock was quantified by quantitative  
11 PCR (qPCR) and HCV stock was quantified by end-point dilution assay as previously described  
12 (1).

### 14 Extracellular viral genome quantification

15 Extracellular HBV DNA quantification was performed with DNA extracted from cell culture  
16 supernatant using DNeasy Blood & Tissue kit (QIAGEN, Germantown, MD, USA). SYBR Green  
17 Master (Roche, Mannheim, Germany) was used for PCR with standards prepared from linearized  
18 plasmid containing 1.3X HBV genome. Primers used:

19 Primer 1, 5'-GGAGGGATACATAGAGGTTTCCTTGA-3';

20 primer 2, 5'-GTTGCCCGTTTGTCTCTAATTC-3'.

21  
22 Extracellular HCV-RNA was extracted in the same way as intracellular RNA using Isolate II RNA  
23 mini kit (Bioline, London, UK). Extracted RNA was used as template in one-step RT-qPCR using  
24 QuantiTect Virus+ROX Viral Kit (QIAGEN, Germantown, MD). HCV primer probe used is the  
25 same as for intracellular HCV RNA quantification. Viremia levels in mice or in patients were  
26 quantified as previously described (2-4).

### 28 Intracellular RNA purification and RT-qPCR

29 Liver tissue samples from humanized chimeric mice were stored in RNAlater (QIAGEN,  
30 Germantown, MD, USA) immediately after harvest and delivered in dry iced box. Upon receipt,  
31 homogenization was done by Tissuelyser LT (QIAGEN, Germantown, MD, USA) and RNA  
32 purification was done using RNeasy Mini Kit (QIAGEN, Germantown, MD, USA). Total cellular  
33 RNA from cell cultures was purified using Isolate II RNA mini kit (Bioline, London, UK).

34  
35 Complementary DNA was obtained following instruction of Maxima First Strand cDNA Synthesis  
36 Kit (Thermo Fisher Scientific, Waltham, MA, USA). Quantitative PCR was performed using the  
37 LightCycler™ 480 system with Probe Master (Roche, Mannheim, Germany). All primer probe sets  
38 for host genes are either pre-designed or self-designed and synthesized by Integrated DNA  
39 Technologies (IDT, Coralville, IA, USA) (Supplemental Table 1). Relative mRNA expression was  
40 analyzed using the second derivative maximum method that includes both normalization to the  
41 reference gene (TBP) and to primer efficiency (a dilution series of a calibrator was included in  
42 each PCR run). At least one additional reference gene ACTB or 18sRNA was also included in  
43 each run to ensure the results are not skewed due to a particular reference gene.

45 For chimeric tissue gene expression analysis, the specificity of human primer probes has been  
46 tested with wild type mice materials and results show no cross reactivity with murine mRNA.  
47

48 **RNAscope assay**

49 *In situ* hybridization for CXCL10, IFNL mRNA, HCV RNA as well as HBV nucleic acid was  
50 performed with 4% PFA fixed cells using the RNAscope fluorescent multiplex detection reagent  
51 kit (#320850) according to the manufacturer's instructions (Advanced Cell Diagnostics Inc., CA,  
52 USA). Predesigned RNAscope probes Hs-CXCL10 (#311851), Hs-IFNL1 (#412341), V-HCV-  
53 GT2a-sense (#441371), V-HBV-GTD (#441351) and their alternative C2 or C3 forms were used  
54 for target binding in multiplex assay. Following signal amplification, probes conjugated to Alexa  
55 488, Atto 550 or Atto 647 (Advanced Cell Diagnostics, Newark, CA, USA) was imaged using a  
56 Zeiss LSM 700 confocal microscope.  
57

58 **Image quantification**

59 RNAscope images were quantified by counting the signal dots number for individual cells using  
60 Analyze Particles tool of Image J software. The fluorescence background of cells shows the  
61 entirety of the cells and is thus used to mark the cell border. For each experimental condition, 50-  
62 100 cells were counted for signal dots contained. Those values are presented on the dot plots  
63 (including all the cells in the view irrespective of its virus positivity). After obtaining this initial  
64 data, the dot numbers of each staining were subtracted by the highest counting from corresponding  
65 control group; all the cells with positive value were considered virus-positive, value of zero or  
66 below were taken as virus-negative. By calculating the percentage of positive cell number to total  
67 cell number, the infection efficiency was calculated and presented in the bar graph.  
68  
69  
70  
71  
72  
73  
74  
75  
76  
77  
78  
79  
80  
81  
82  
83  
84  
85  
86  
87  
88  
89

90 **Supplemental References**

91 1. Li Q, Lowey B, Sodroski C, Krishnamurthy S, Alao H, Cha H, et al. Cellular microRNA  
92 networks regulate host dependency of hepatitis C virus infection. *Nature communications*.  
93 2017;8(1):1789.

94 2. Hiraga N, Imamura M, Tsuge M, Noguchi C, Takahashi S, Iwao E, et al. Infection of human  
95 hepatocyte chimeric mouse with genetically engineered hepatitis C virus and its  
96 susceptibility to interferon. *FEBS letters*. 2007;581(10):1983-7.

97 3. Tsuge M, Hiraga N, Takaishi H, Noguchi C, Oga H, Imamura M, et al. Infection of human  
98 hepatocyte chimeric mouse with genetically engineered hepatitis B virus. *Hepatology*.  
99 2005;42(5):1046-54.

100 4. Liu CJ, Chuang WL, Sheen IS, Wang HY, Chen CY, Tseng KC, et al. Efficacy of Ledipasvir  
101 and Sofosbuvir Treatment of HCV Infection in Patients Coinfected With HBV.  
102 *Gastroenterology*. 2018;154(4):989-97.

103

104 **Supplemental Figures and Legends**

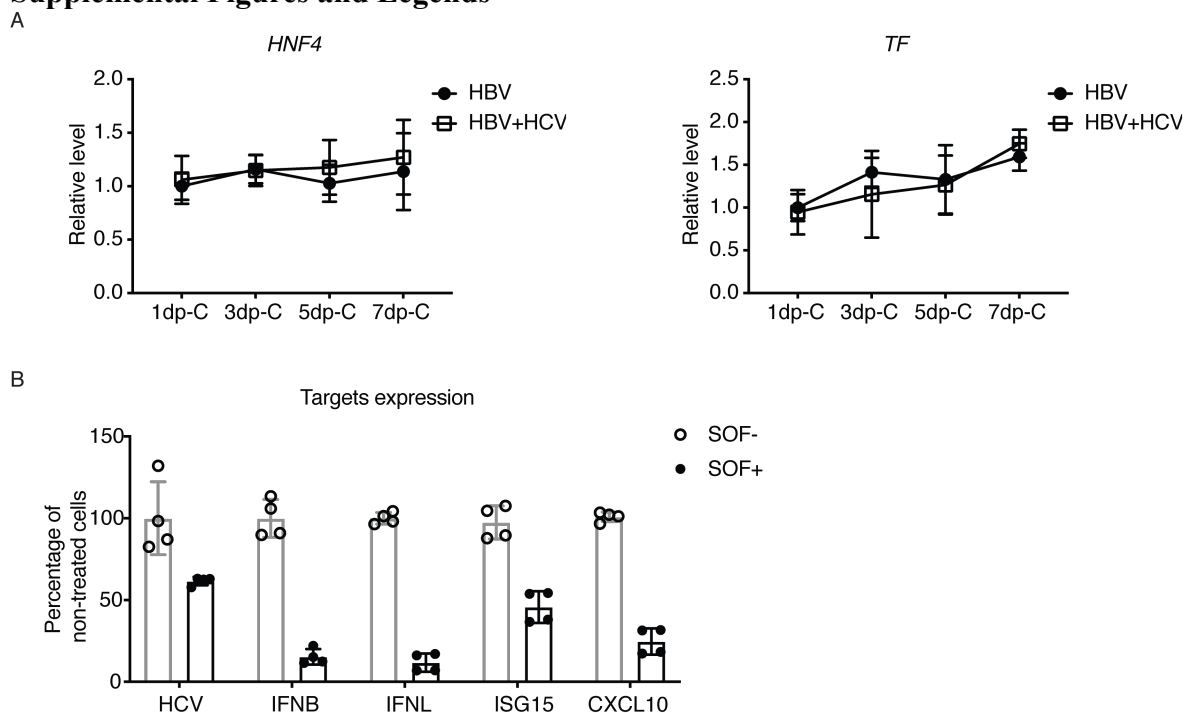

105  
 106 **Supplemental Figure 1. Confirmation of unaltered hepatocyte function in coinfecting PHH**  
 107 **and successful HCV infection in PHH.** (A) Target gene expression from the same experiment of  
 108 Figure 1 were measured by RT-qPCR. Normalized gene expressions relative to those in the HBV  
 109 mono-infected cells on 1 dp-C (set as 1) were shown as relative levels for *HNF4* and *TF*. (B) PHHs  
 110 (lot Hu1832) were infected with HCV at MOI=1 TCID<sub>50</sub>/cell overnight with addition of 10 μM  
 111 SOF. Cells were lysed after 3 times of washing with PBS to remove the input virus. RNA was  
 112 extracted for gene expression analysis by RT-qPCR. Results are shown as percentages of infected  
 113 but non-treated cells. Means ± SD are shown. The results are representative of three separate  
 114 experiments.

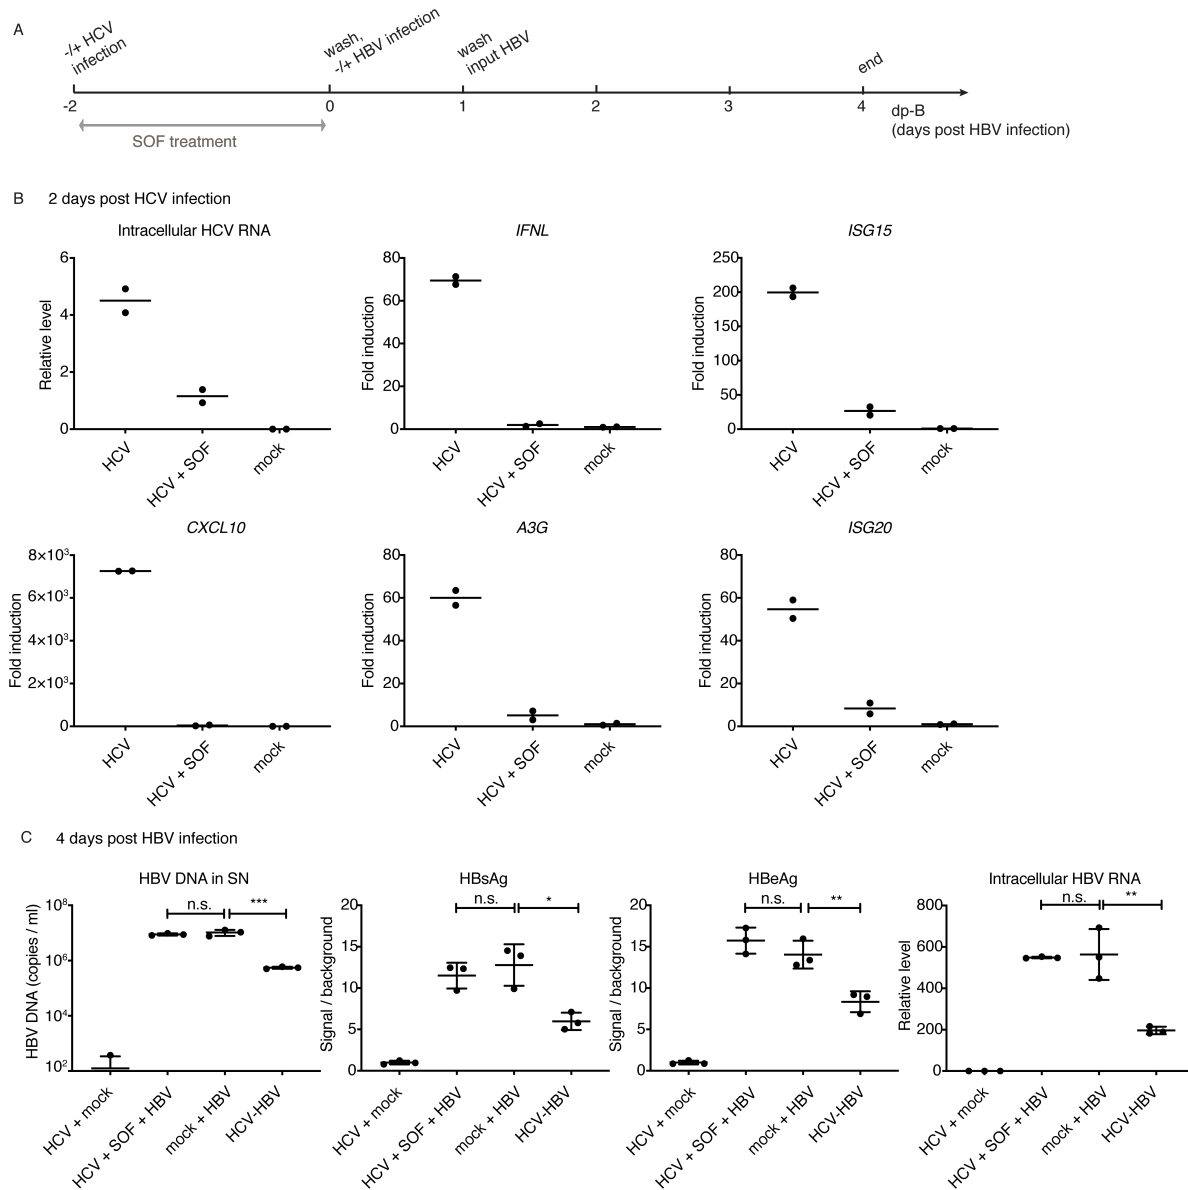

115  
 116 **Supplemental Figure 2. HBV super-infection in HCV infected PHHs.** (A) Schematic  
 117 representation of the experimental setting. PHHs (lot Hu1832) were mock treated or HCV infected  
 118 (MOI=1 TCID<sub>50</sub>/mL) for 2 days with the addition of 10 μM SOF as indicated. Cells were then  
 119 super-infected with HBV or mock infected. Medium was changed daily until day 4 post HBV  
 120 infection. (B) 2 days after HCV infection, a set of cells were lysed to check HCV RNA and host  
 121 *IFNL1*, *ISG15*, *CXCL10*, *A3G* and *ISG20* expression by RT-qPCR. Fold induction was calculated  
 122 by comparing to mock. Duplicate wells were used for each group and means were plotted. (C) 4  
 123 days after HBV infection, cells (n=3) were analyzed for HBV infection markers including  
 124 extracellular HBV DNA by qPCR, extracellular HBsAg and HBeAg by ELISA, and intracellular  
 125 HBV RNA by RT-qPCR. Comparisons were made by unpaired t-test. Means ± SD are shown.  
 126 \**P*< 0.05, \*\**P*<0.01, \*\*\**P*<0.001, \*\*\*\**P*<0.0001. The results are representative of three separate  
 127 experiments.  
 128

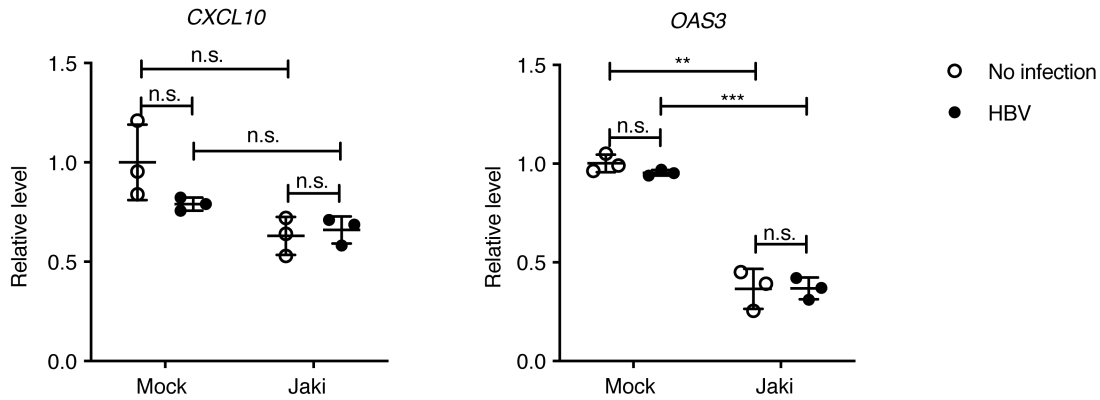

129  
 130 **Supplemental Figure 3. Effect of Jaki treatment on basal expression of *CXCL10* and *OAS3***  
 131 **in PHHs.** Standard culture of Hu1832 and its HBV-infected counterpart were treated with either  
 132 vehicle control or 1  $\mu$ M Jaki for 7 days. Treatment was renewed every 3 days after virus  
 133 inoculation. mRNA expression were quantified using RT-qPCR. Relative levels were calculated  
 134 by comparing to mock treated non-infected cells. The comparison between two groups were made  
 135 by unpaired t-test and further corrected by Hochberg procedure for multiple comparisons.  
 136 \*\* $P < 0.01$ , \*\*\* $P < 0.001$ . Triplicate wells were used for each group.  
 137

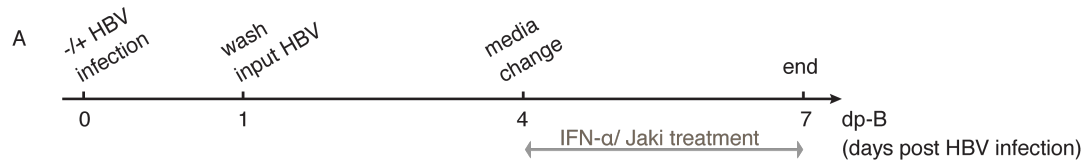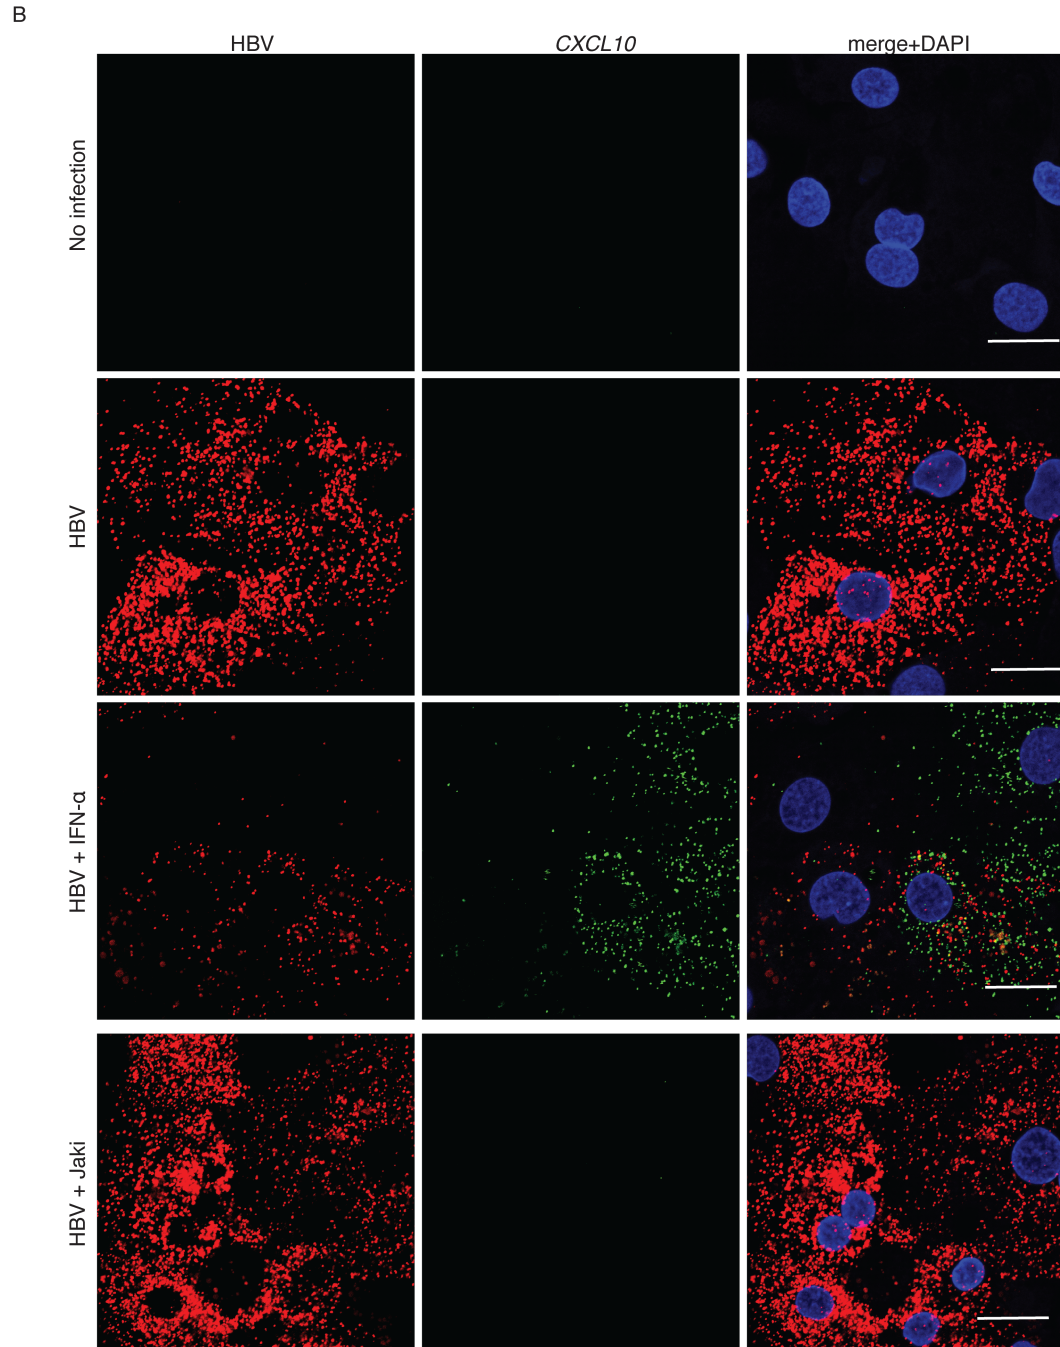

138  
 139 **Supplemental Figure 4. Specificity validation of in situ detection using HBV mono-infected**  
 140 **PHHs.** (A) Schematic representation of the experiment setting. PHHs (lot Hu1663) were infected  
 141 with HBV for 7 days or only mock treated. 3 days before the end of experiment, infected cells

142 were treated with 1000 IU/ml IFN- $\alpha$  or 5  $\mu$ M Jaki. (B) Fixed cells were hybridized with probe sets  
143 targeting RNA expression of HBV and *CXCL10*. Cell nuclei were counterstained by DAPI. Final  
144 signals are shown in red for HBV, green for *CXCL10* and blue for nuclei. Scale bar = 20  $\mu$ m. The  
145 results are representative of three separate experiments.



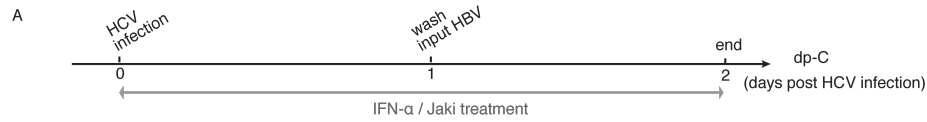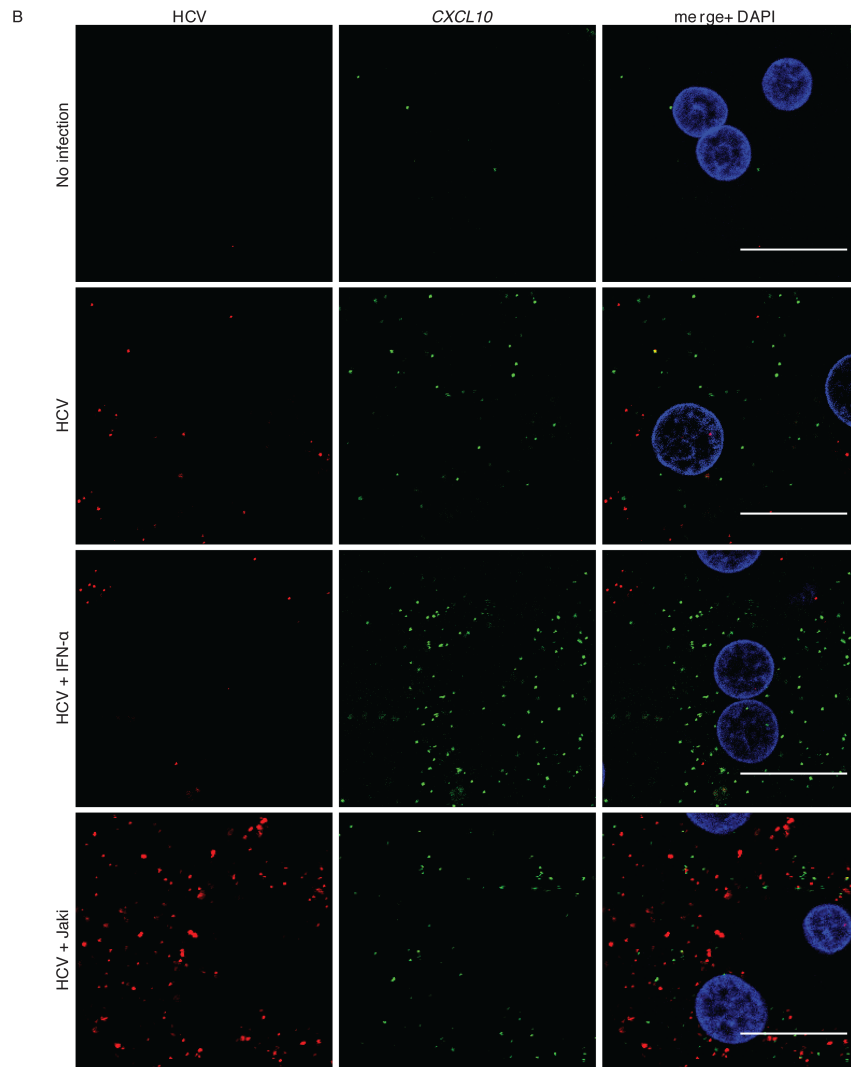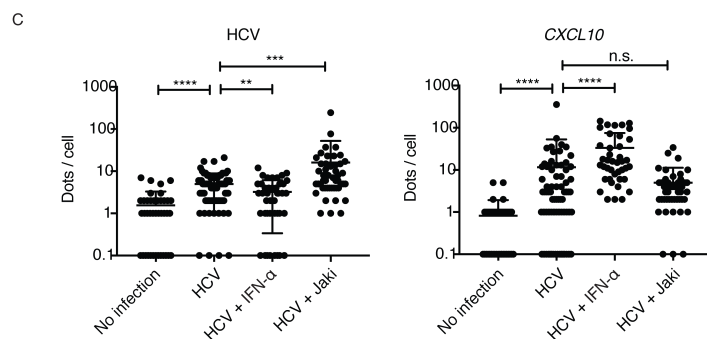

146  
 147 **Supplemental Figure 5. Specificity validation of in situ detection using HCV mono-infected**  
 148 **PHHs.** (A) Schematic representation of the experimental setting. PHHs (lot Hu8196) were infected  
 149 with HCV at MOI=0.5 TCID<sub>50</sub>/cell overnight with addition of 1000 IU/mL IFN- $\alpha$  or 5  $\mu$ M Jaki.

150 Input virus was washed away the next day and the treatment was renewed following medium  
151 change. (B) Fixed cells were hybridized with probe sets targeting HCV RNA and mRNA of  
152 *CXCL10*. Cell nuclei were counterstained by DAPI. Final signals are shown in red for HCV, green  
153 for *CXCL10* and blue for nuclei. Scale bar = 20  $\mu\text{m}$ . (C) Target dots number were quantified using  
154 image J as described in Supplemental material. Comparisons were made by unpaired t-test. Means  
155  $\pm$  SD are shown. n.s.=not significant, \*\* $P<0.01$ , \*\*\* $P<0.001$ , \*\*\*\* $P<0.0001$ . The results are  
156 representative of three separate experiments.

A

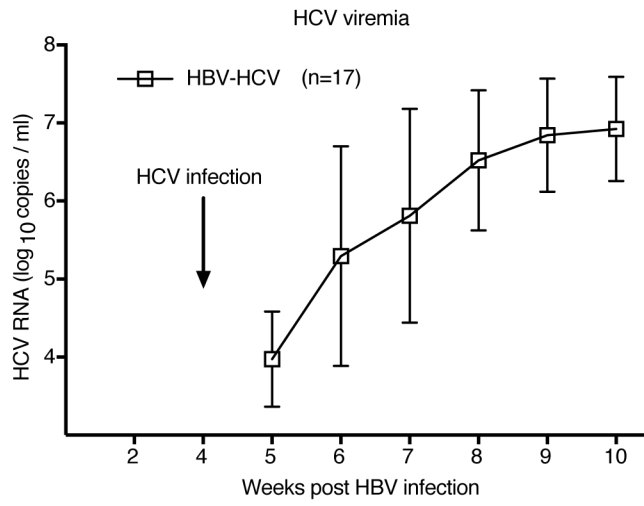

157  
158  
159

**Supplemental Figure 6. HCV viremia of HBV-HCV coinfecting mice.** The experiment is described in Figure 5 A and B. Means  $\pm$  SD are shown.

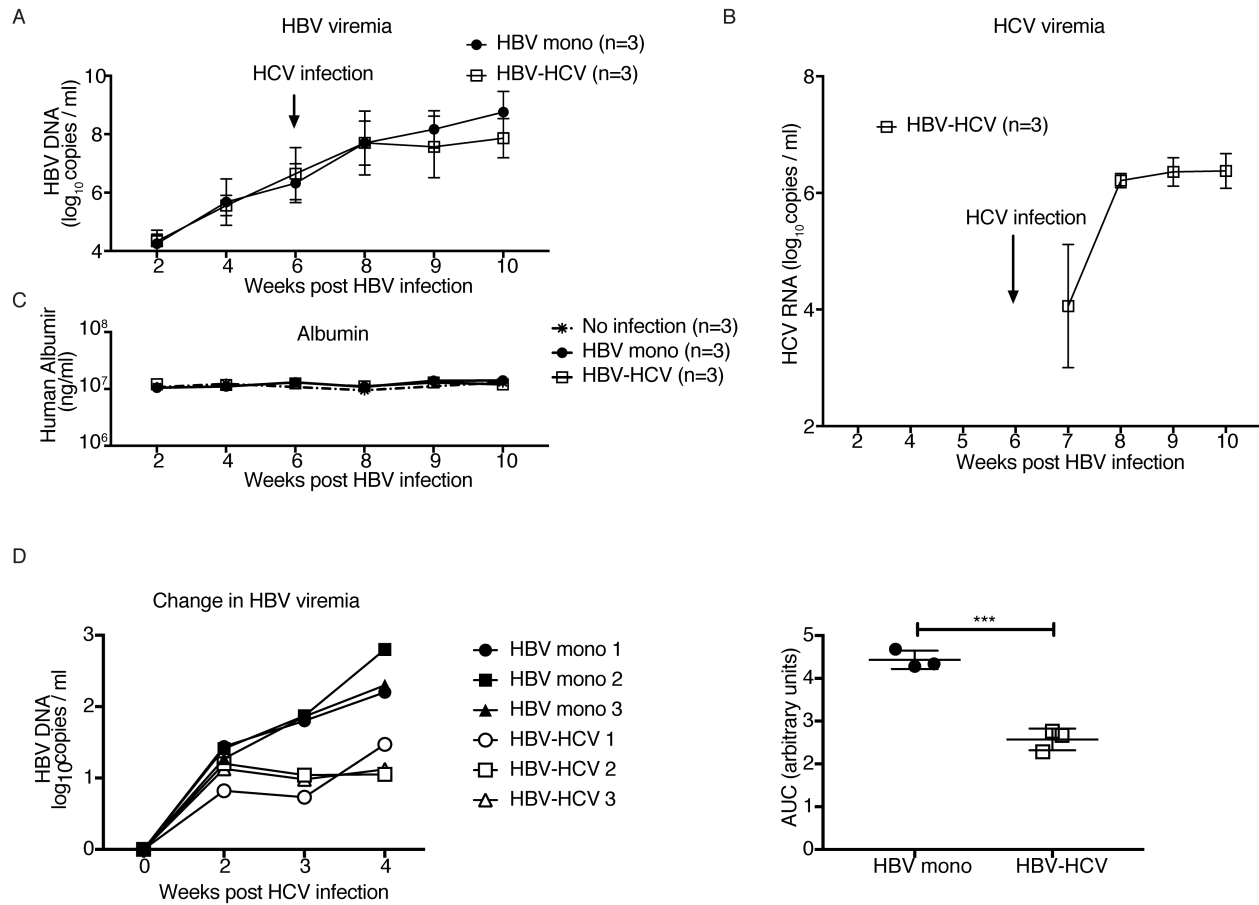

160  
 161 **Supplemental Figure 7. Virologic profiles and human albumin concentrations of HBV-HCV**  
 162 **coinfecting mice that were sacrificed for hepatic gene expression analysis.** In relation to Figure  
 163 5C&D. Serum HBV-DNA in HBV infected mice (A), serum HCV RNA in coinfecting mice (B)  
 164 and human albumin concentration (C) in all the mice were measured at indicated times. Changes  
 165 of HBV viremia (D, left) after HCV infection were calculated by comparing the HBV DNA load  
 166 at indicated time to the level before HCV inoculation. Area under the curve (AUC; D, right) was  
 167 generated by Prism software for individual mice to represent net total virus production after HCV  
 168 inoculation. Means ± SD are shown. Comparisons between groups were made by unpaired t-test.  
 169 \*\*\* $P < 0.001$ .

A

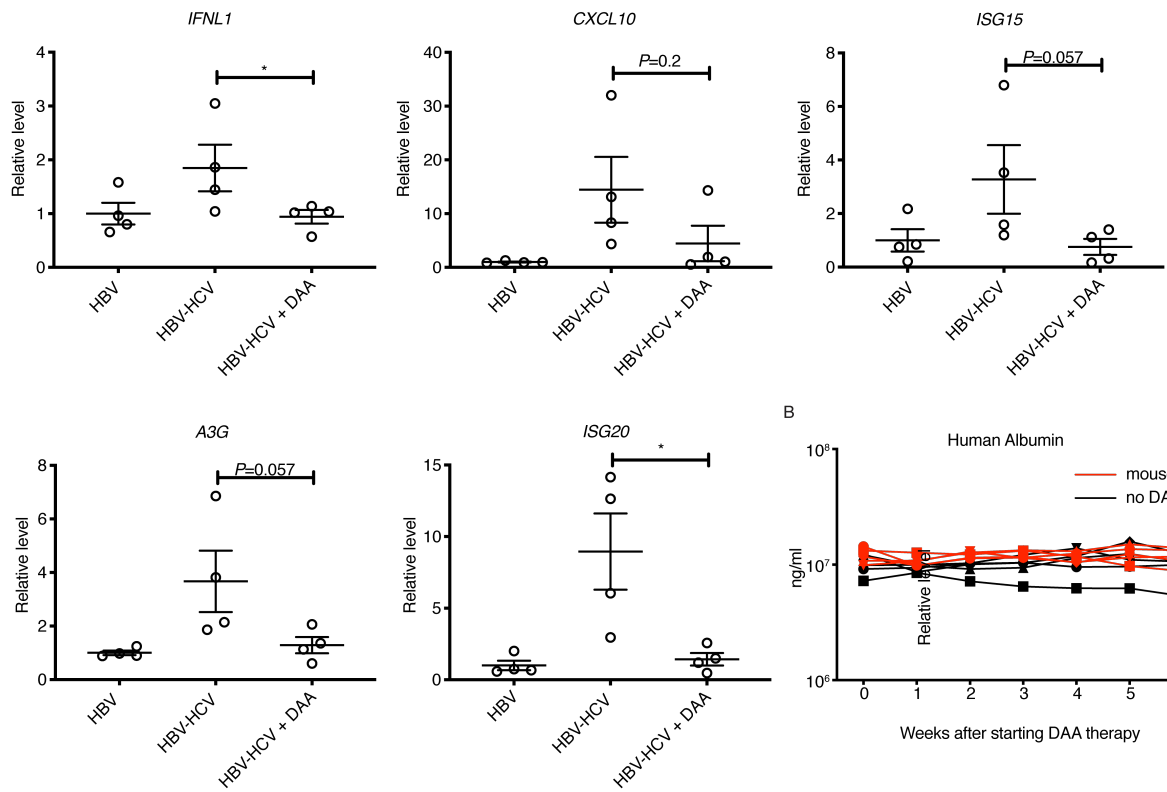

170

171 **Supplemental Figure 8. Hepatic ISGs expression in coinfecting mice after HCV clearance and**  
 172 **human albumin levels in mouse serum.** (A) As described in Figure 5E, DAA treated (n=4) and  
 173 matched control group (n=4) coinfecting mice were sacrificed 4 weeks after the end of treatment.  
 174 Mice infected with HBV only for 17 weeks (n=4) were served as negative control for IFN response.  
 175 Mouse liver tissues were used for RNA extraction and RT-qPCR for human *IFNL1* and ISGs  
 176 transcriptional expression analysis. Relative levels were determined by normalizing to HBV  
 177 mono-infected mice samples. Means  $\pm$  SEM are shown. Comparisons between groups were made  
 178 by unpaired t-test. \* $P < 0.05$ . (B) Human albumin levels at indicated times were shown.

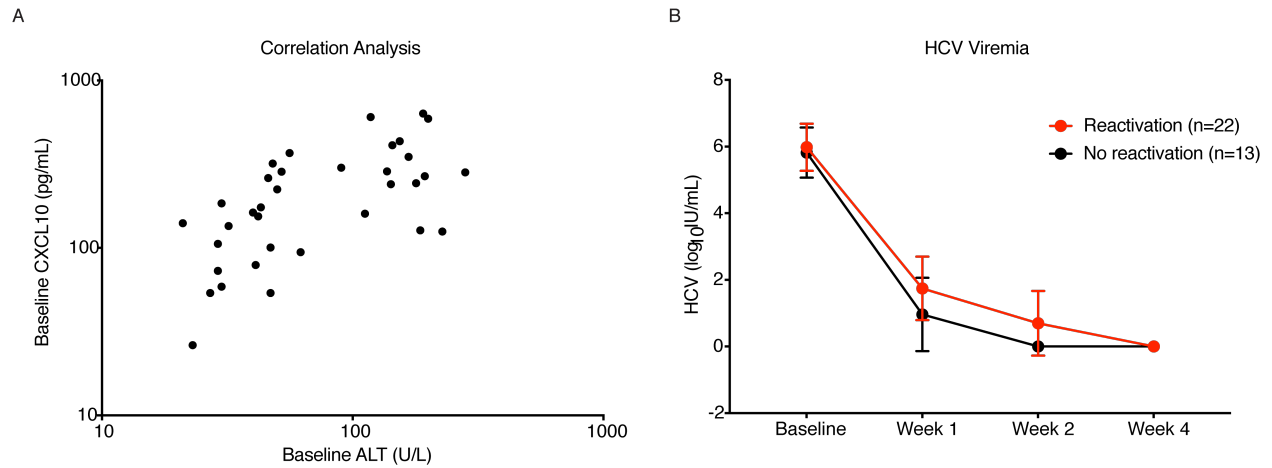

179  
 180 **Supplemental Figure 9. Correlation of baseline CXCL10 and ALT levels in 35 patients, and**  
 181 **baseline and longitudinal changes of HCV viremia in coinfecting patients undergoing DAA**  
 182 **regimen. (A) Non-parametric Spearman correlation analysis was performed.  $r=0.6231$ ,  $P<0.0001$ .**  
 183 **(B) HCV RNA level was input as 0 when below the lower limit of quantification (15 IU/mL).**  
 184 **Means  $\pm$  SD are shown.**

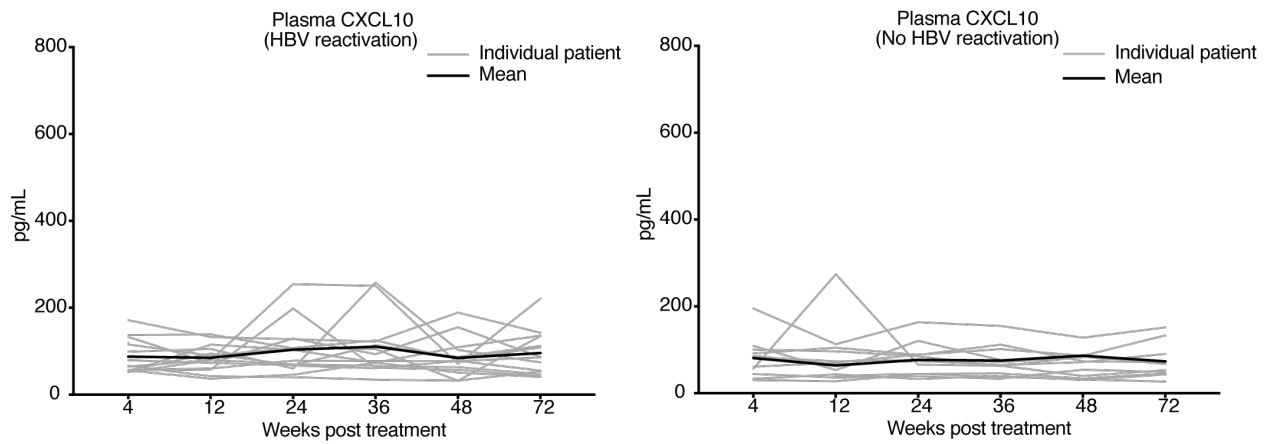

185  
 186 **Supplemental Figure 10. Plasma CXCL10 levels from post-treatment week 4 to post-**  
 187 **treatment week 72 of HBV-HCV coinfected patients.** Patients are grouped based on having  
 188 HBV reactivation (left) or not (right). CXCL10 levels of individual patient (gray line) as well as  
 189 group mean (black line) at indicated times are shown.

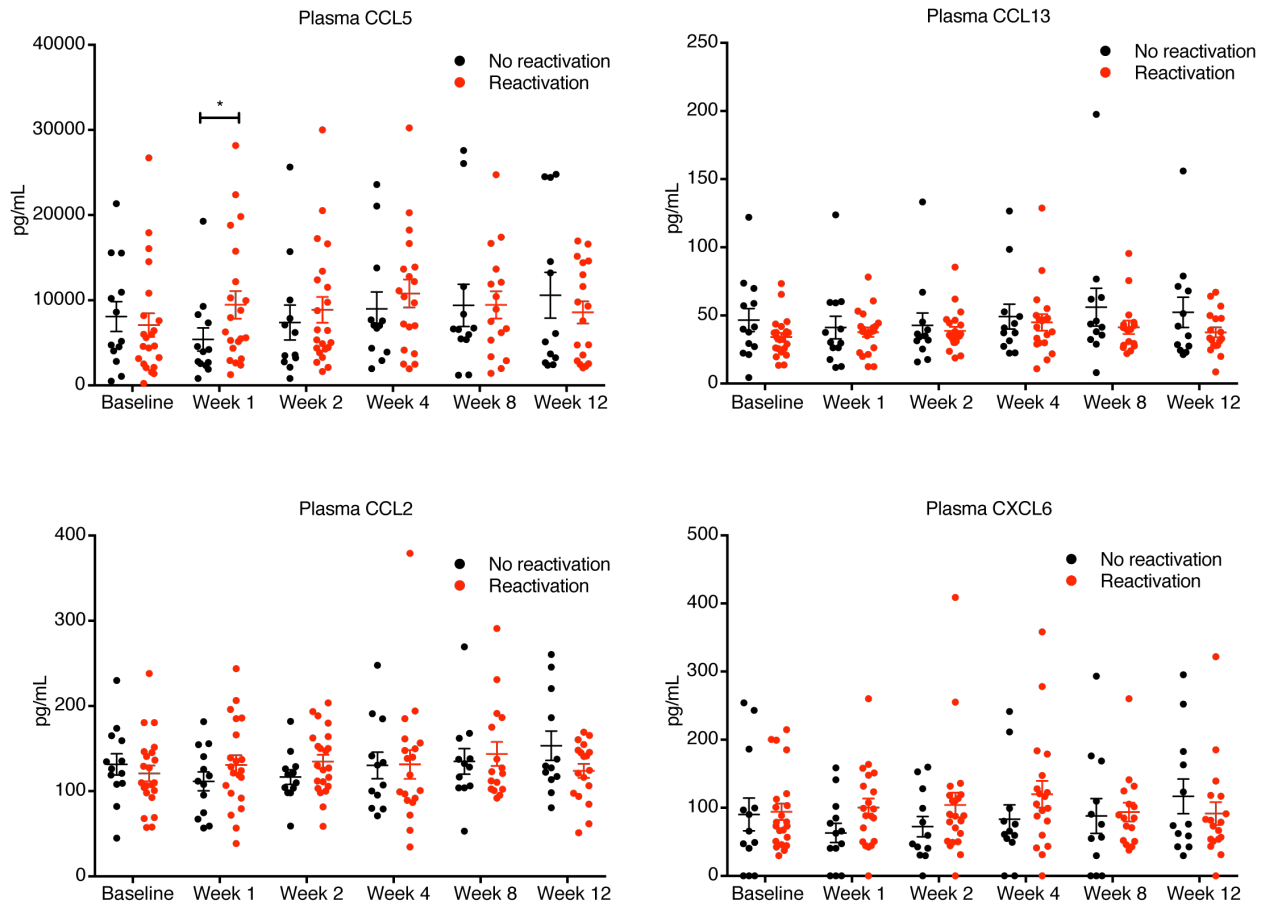

190  
191  
192  
193  
194  
195

**Supplemental Figure 11. Baseline and longitudinal changes of immune related cytokines in coinfecting patients undergoing DAA regimen.** Plasma samples of coinfecting patients from indicated times were measured by multiplex assay for CCL5, CCL13, CCL2 and CXCL6. Means  $\pm$  SEM are shown. Comparisons between groups were made by unpaired t-test. \* $P < 0.05$



196

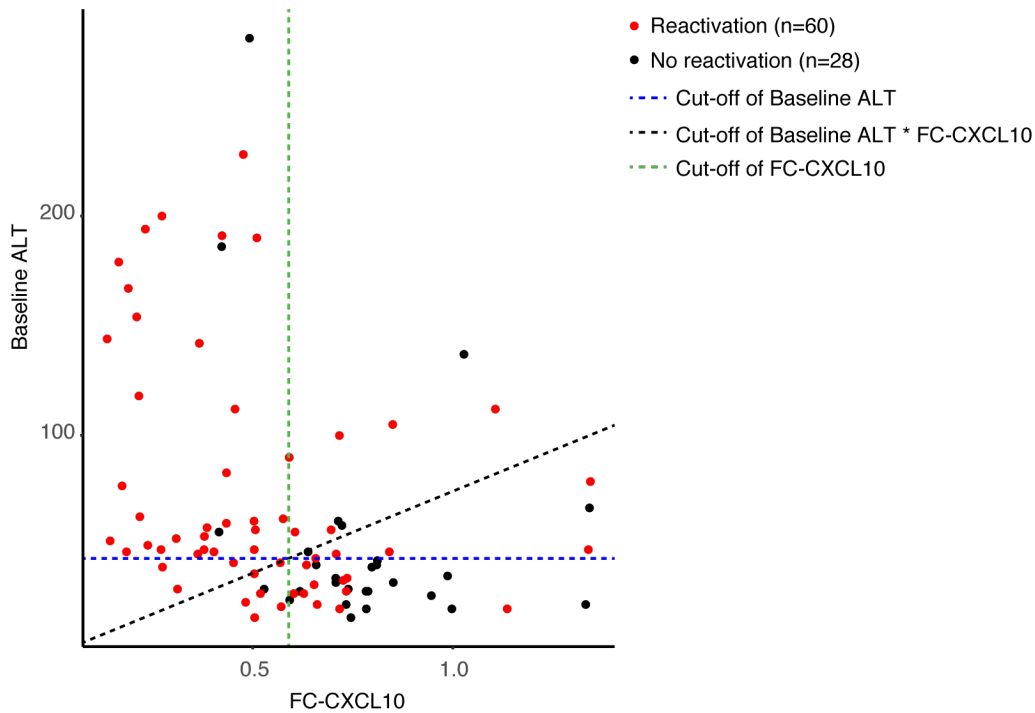

197  
198  
199  
200  
201  
202  
203  
204  
205  
206  
207  
208  
209  
210  
211  
212  
213  
214  
215  
216  
217  
218  
219  
220

**Supplemental Figure 12. Scatter plot of baseline ALT and fold-change of CXCL10 of combined group of 88 patients.** Baseline ALT and FC-CXCL10 values of individual patients (patients experience HBV reactivation, red dots; patients without HBV reactivation, black dots) were plotted. Youden index of the three prediction models were used as best cut-off values to separate patient groups are shown (baseline ALT, blue line; baseline ALT\*FC-CXCL10, black line; FC-CXCL10, green line).

221 **Supplemental Tables**

222 **Supplemental Table 1. Primers and Probes for Taqman RT-qPCR Assay.**

| <b>Pre-designed Assay</b>  |                    |                                                                                                                                                         |
|----------------------------|--------------------|---------------------------------------------------------------------------------------------------------------------------------------------------------|
| <b>Name</b>                | <b>Gene Symbol</b> | <b>IDT Assay ID</b>                                                                                                                                     |
| IFNL1                      | <i>IFNL1</i>       | Hs.PT.56a.21113836.g                                                                                                                                    |
| CXCL10                     | <i>CXCL10</i>      | Hs.PT.58.3790956.g                                                                                                                                      |
| ISG15                      | <i>ISG15</i>       | Hs.PT.58.39185901.g                                                                                                                                     |
| ISG20                      | <i>ISG20</i>       | Hs.PT.58.20870590                                                                                                                                       |
| A3G                        | <i>APOBEC3G</i>    | Hs.PT.58.27074917                                                                                                                                       |
| OAS3                       | <i>OAS3</i>        | Hs.PT.58.4561974                                                                                                                                        |
| TBP                        | <i>TBP</i>         | Hs.PT.58v.39858774                                                                                                                                      |
| 18sRNA                     | <i>RNA18S5</i>     | Hs.PT.39a.22214856.g                                                                                                                                    |
| ACTB                       | <i>ACTB</i>        | Hs.PT.39a.22214847                                                                                                                                      |
| <b>Self-designed Assay</b> |                    |                                                                                                                                                         |
| <b>Name</b>                | <b>Gene Symbol</b> | <b>Sequence</b>                                                                                                                                         |
| HBV                        |                    | F-primer: 5'-GTTGCCCGTTTGTCCCTCTAATTC-3'<br>R-primer: 5'-GGAGGGATACATAGAGGTTCCCTTGA-3'<br>Probe: 5'-/56-FAM/ACCATGCCG/ZEN/GACCTGCATGACTACTG/3IABkFQ/-3' |
| HCV                        |                    | F-primer: 5'-GCTAGCCGAGTAGCGTTGGGT-3'<br>R-primer: 5'-TGCTCATGGTGCACGGTCTAC-3'<br>Probe: 5'-/56-FAM/TACTGCCTG/Zen/ATAGGGCGCTTGCGAGTG/3IABkFQ/-3'        |

223

224 **Supplemental Table 2. Disease characteristics and serum markers of 53 coinfecting patients.**

| Characteristic                            | Reactivation<br>(n=38) <sup>b</sup> | No reactivation<br>(n=15) |
|-------------------------------------------|-------------------------------------|---------------------------|
| Baseline HBV DNA, log <sub>10</sub> IU/mL |                                     |                           |
| Mean (range)                              | 1.9 (1.3-4.1)                       | 2.37 (1.7-5.8)            |
| ≥LLOQ <sup>a</sup> , n (%)                | 26 (68)                             | 15 (100)                  |
| Positive HBsAg, n (%)                     | 38 (100)                            | 15 (100)                  |
| Baseline HCV RNA, log <sub>10</sub> IU/mL |                                     |                           |
| Mean (range)                              | 5.7 (4.2-6.9)                       | 6.3 (5.6-6.9)             |
| Baseline ALT, U/L                         |                                     |                           |
| Mean (range)                              | 53 (17-190)                         | 36.7 (17-67)              |
| FC-ALT <sup>c</sup>                       |                                     |                           |
| Mean (range)                              | 0.6 (0.28-0.94)                     | 0.8 (0.46-1.6)            |
| Baseline CXCL10, pg/mL <sup>d</sup>       |                                     |                           |
| Mean (range)                              | 72.6 (20.9-245.8)                   | 40.8 (18.4-63.9)          |
| FC-CXCL10                                 |                                     |                           |
| Mean (range)                              | 0.61 (0.17-1.34)                    | 0.77 (0.55-1.34)          |
| Week1 CCL5, pg/mL <sup>d</sup>            |                                     |                           |
| Mean (range)                              | 24383 (1338-52910)                  | 24078 (5201-40812)        |
| FC-CCL5                                   |                                     |                           |
| Mean (range)                              | 1.2 (0.3-4.1)                       | 1.0 (0.6-1.5)             |

225 Abbreviations: HBV, hepatitis B virus; LLOQ, lower limit of quantification; HCV, hepatitis C  
 226 virus; ALT, alanine aminotransferase; DAA, direct-acting antiviral; FC, fold-change

227 <sup>a</sup> LLOQ = 1.3 Log<sub>10</sub> IU/mL, ≤LLOQ is considered as 1.3 in the range.

228 <sup>b</sup> 16 patients had HBV reactivation during DAA treatment and 21 patients had HBV reactivation  
 229 post DAA treatment.

230 <sup>c</sup> FC = Week 1/baseline

231 <sup>d</sup> CXCL10 and CCL5 levels were measured with a different assay from that of the pilot cohort of  
 232 35 patients in Table 1, and thus cannot be directly compared to the values from the pilot cohort.

233  
 234  
 235  
 236  
 237  
 238  
 239  
 240  
 241

242 **Supplemental Table 3. Summary of prediction models for HBV reactivation.**

| <b>Models</b>                          | <b>Accuracy</b> | <b>AUC</b> | <b>95% Confidential Interval</b> | <b>Sensitivity</b> | <b>Specificity</b> |
|----------------------------------------|-----------------|------------|----------------------------------|--------------------|--------------------|
| FC-CCL5                                | 0.68            | 0.63       | 0.50-0.75                        | 0.92               | 0.32               |
| Baseline ALT                           | 0.68            | 0.68       | 0.56-0.8                         | 0.68               | 0.71               |
| FC-CXCL10                              | 0.7             | 0.81       | 0.71-0.90                        | 0.67               | 0.86               |
| Baseline ALT * FC-<br>CXCL10           | 0.74            | 0.81       | 0.71-0.90                        | 0.68               | 0.86               |
| Baseline ALT * FC-<br>CXCL10 + FC-CCL5 | 0.72            | 0.82       | 0.73-0.90                        | 0.68               | 0.93               |

243 Abbreviations: AUC, area under curve; FC, fold-change

244

245 **Supplemental Table 4. Characteristics of an independent cohort of HBV-HCV coinfectd**  
 246 **patients from Japan and Germany.**

| <b>Characteristic</b>                                  | <b>Japan (n=10)</b>                       | <b>Germany (n=6)</b>                                                       | <b>Total (n=16)</b>                                                         |
|--------------------------------------------------------|-------------------------------------------|----------------------------------------------------------------------------|-----------------------------------------------------------------------------|
| Age, mean (range)                                      | 59 (36-80)                                | 45 (28-63)                                                                 | 53 (28-80)                                                                  |
| Male, n (%)                                            | 8 (80%)                                   | 6 (100%)                                                                   | 14 (88%)                                                                    |
| Race, n (%)                                            | Asian, 10 (100)                           | Middle East, 1 (17)<br>African, 1 (17)<br>Caucasian, 4 (67)                | Asian, 10 (63)<br>Middle east, 1 (6)<br>African, 1 (6)<br>Caucasian, 4 (25) |
| Baseline ALT, U/L                                      |                                           |                                                                            |                                                                             |
| Mean (range)                                           | 69 (19-153)                               | 73 (20-94)                                                                 | 70 (19-53)                                                                  |
| Baseline HBV DNA, log <sub>10</sub> IU/mL              |                                           |                                                                            |                                                                             |
| Mean (range)                                           | 2.3 (2.0-3.8)                             | 3.5 (2.0-8.2)                                                              | 2.8 (2.1-8.2)                                                               |
| >LLOQ <sup>a</sup> , n (%)                             | 2 (20)                                    | 5 (83)                                                                     | 7 (44)                                                                      |
| Positive HBsAg, n (%)                                  | 10 (100)                                  | 6 (100)                                                                    | 16 (100)                                                                    |
| HBV reactivation, n (%)                                | 5 (50)                                    | 4 (67)                                                                     | 9 (56)                                                                      |
| Time of HBV reactivation                               |                                           |                                                                            |                                                                             |
| During DAA treatment, n                                | 3                                         | 3                                                                          | 6                                                                           |
| Post DAA treatment, n                                  | 2                                         | 1                                                                          | 3                                                                           |
| HBV DNA level at reactivation, log <sub>10</sub> IU/mL | 2.8 (2.2-3.5)                             | 3.6 (1.9-5.4)                                                              | 3.2 (1.9-5.4)                                                               |
| ETV treatment needed?                                  |                                           |                                                                            |                                                                             |
| No, n                                                  | 3                                         | 3                                                                          | 6                                                                           |
| Yes, n                                                 | 2                                         | 1                                                                          | 3                                                                           |
| Baseline HCV RNA, log <sub>10</sub> IU/mL              |                                           |                                                                            |                                                                             |
| Mean (range)                                           | 5.9 (4.2-7.0)                             | 6.0 (5.4-6.5)                                                              | 6.0 (4.2-7)                                                                 |
| DAA treatment type (n)                                 | SOF+RBV (6)<br>SOF+LDV (2)<br>DCV+ASV (2) | SOF+RBV (2)<br>SOF+RBV+DCV (1)<br>SOF+LDV (1)<br>SOF+DCV(1)<br>GLE+PIB (1) |                                                                             |
| Treatment duration, weeks (n)                          | 12 (8)<br>24 (2)                          | 8 (2)<br>12 (2)<br>24 (2)                                                  |                                                                             |
| SVR24, n (%)                                           | 10 (100)                                  | 6 (100)                                                                    | 16 (100)                                                                    |
| Previous HBV treatment, n (%)                          |                                           |                                                                            |                                                                             |
| No                                                     | 10 (100)                                  | 6 (100)                                                                    | 16 (100)                                                                    |
| Yes                                                    | 0                                         | 0                                                                          |                                                                             |
| Previous HCV treatment, n(%)                           |                                           |                                                                            |                                                                             |
| No                                                     | 9 (90)                                    | 3 (50)                                                                     | 12 (75)                                                                     |
| Yes                                                    | 1 (10)                                    | 3 (50)                                                                     | 4 (25)                                                                      |

247 Abbreviations: HBV, hepatitis B virus; LLOQ, lower limit of quantification; HCV, hepatitis C  
 248 virus; ALT, alanine aminotransferase; DAA, direct-acting antiviral; SOF, sofosbuvir; RBV,  
 249 ribavirin; DCV, daclatasvir; LDV, ledipasvir; ASV, asunaprevir; GLE, glecaprevir; PIB,  
 250 pibrentasvir

251 <sup>a</sup> LLOQ =2.0 Log<sub>10</sub> IU/mL, ≤LLOQ is considered as 2.0 in the mean determination.
